# Supplementary material for: Influences of Forest Structure, Climate and Species Composition on Tree Mortality across the Eastern US
Source: PLoS One. 2010 Oct 13;5(10):e13212. doi: 10.1371/journal.pone.0013212 (PMC2954149; doi:10.1371/journal.pone.0013212)
Supplement: Table S2 — Table of maximum likelihood estimators (MLEs), Bayesian means and 2.5% and 97.5% confidence levels calculated from the posterior distributions for each of the 15 parameters of Eqn (9) for each of the 21 common species parameterised by the adaptive MCMC algorithm. The burn-in for the algorithm was 750,000 iterations and the sampling was 250,000 iterations. (0.18 MB DOC) [file pone.0013212.s002.doc]

**Table S2. Fitted parameter values for each of the 21 common species.**

Table S2

| **Parameter** | | **Species** |  |  |  |  |  |  |  |  |  |  |  |  |  |  |  |  |  |  |  |  |
| --- | --- | --- | --- | --- | --- | --- | --- | --- | --- | --- | --- | --- | --- | --- | --- | --- | --- | --- | --- | --- | --- | --- |
| (from Eqn (9)) | | *Acer rubrum* | *Pinus taeda* | *Quercus alba* | *Liquidambar styraciflua* | *Populus tremuloides* | *Acer saccarum* | *Quercus rubrum* | *Pinus echinata* | *Liriodendron tulipifera* | *Quercus velutina* | *Quercus prinus* | *Quercus stellata* | *Carya* spp | *Thuja occidentalis* | *Nyssa slyvatica* | *Quercus nigra* | *Betula papyferia* | *Fagus gra-ndifolia* | *Pinus virginiana* | *Fraxinus americana* | *N. sylv. (biflora)* |
| αj | Bayesian Mean | -3.187 | -3.258 | -3.256 | -3.510 | -5.675 | -5.374 | -3.538 | -2.151 | -2.994 | -3.370 | -2.838 | -3.810 | -2.731 | -2.313 | -1.502 | -2.570 | -6.793 | -3.634 | -2.948 | -4.487 | -2.881 |
| MLE | -3.290 | -3.261 | -3.251 | -3.857 | -5.580 | -5.012 | -3.568 | -2.164 | -3.352 | -3.389 | -3.166 | -3.410 | -1.994 | -2.257 | -1.636 | -2.496 | -6.313 | -2.650 | -2.865 | -4.509 | -2.730 |
|  | 2.5% | -3.613 | -3.540 | -3.631 | -4.067 | -5.960 | -5.830 | -3.932 | -2.647 | -3.896 | -3.742 | -3.447 | -4.162 | -3.185 | -3.108 | -2.502 | -3.279 | -7.546 | -5.030 | -3.700 | -5.073 | -3.474 |
|  | 97.5% | -2.849 | -2.953 | -2.952 | -2.907 | -5.470 | -4.887 | -3.198 | -1.732 | -2.237 | -3.014 | -2.114 | -3.402 | -2.211 | -1.626 | -0.621 | -1.805 | -6.233 | -2.139 | -2.245 | -3.858 | -2.204 |
| β1j | Bayesian Mean | -0.279 | -0.362 | -0.308 | -0.254 | -0.131 | -0.319 | -0.214 | -0.344 | -0.290 | -0.207 | -0.390 | -0.333 | -0.316 | -0.226 | -0.265 | -0.227 | -0.103 | -0.363 | -0.502 | -0.251 | -0.276 |
| MLE | -0.284 | -0.366 | -0.305 | -0.265 | -0.135 | -0.320 | -0.214 | -0.347 | -0.275 | -0.215 | -0.388 | -0.335 | -0.304 | -0.266 | -0.247 | -0.231 | -0.125 | -0.359 | -0.497 | -0.235 | -0.263 |
|  | 2.5% | -0.296 | -0.376 | -0.324 | -0.271 | -0.146 | -0.346 | -0.233 | -0.368 | -0.319 | -0.223 | -0.421 | -0.354 | -0.343 | -0.277 | -0.308 | -0.248 | -0.138 | -0.408 | -0.548 | -0.279 | -0.314 |
|  | 97.5% | -0.261 | -0.349 | -0.293 | -0.238 | -0.116 | -0.293 | -0.193 | -0.319 | -0.264 | -0.190 | -0.359 | -0.313 | -0.291 | -0.173 | -0.224 | -0.206 | -0.070 | -0.315 | -0.454 | -0.223 | -0.238 |
| β2j | Bayesian Mean | -0.045 | -0.030 | -0.028 | -0.032 | -0.047 | -0.039 | -0.032 | -0.029 | -0.026 | -0.030 | -0.030 | -0.033 | -0.036 | -0.055 | -0.035 | -0.033 | -0.053 | -0.040 | -0.040 | -0.030 | -0.037 |
| MLE | -0.045 | -0.030 | -0.028 | -0.032 | -0.047 | -0.040 | -0.033 | -0.029 | -0.027 | -0.030 | -0.029 | -0.033 | -0.036 | -0.056 | -0.035 | -0.033 | -0.056 | -0.041 | -0.039 | -0.030 | -0.038 |
|  | 2.5% | -0.047 | -0.031 | -0.029 | -0.033 | -0.050 | -0.041 | -0.034 | -0.031 | -0.027 | -0.032 | -0.031 | -0.034 | -0.038 | -0.060 | -0.037 | -0.034 | -0.061 | -0.043 | -0.042 | -0.032 | -0.040 |
|  | 97.5% | -0.043 | -0.029 | -0.027 | -0.031 | -0.045 | -0.037 | -0.031 | -0.028 | -0.024 | -0.029 | -0.029 | -0.032 | -0.034 | -0.050 | -0.032 | -0.031 | -0.046 | -0.038 | -0.038 | -0.027 | -0.034 |
| β3j | Bayesian Mean | 0.437 | -1.146 | 0.395 | -0.104 | 0.359 | 0.320 | 0.551 | -0.185 | -0.085 | 0.939 | 0.885 | -0.285 | 0.100 | 0.158 | -0.403 | -0.545 | 0.539 | 0.510 | -0.163 | 0.899 | 0.180 |
| MLE | 0.429 | -1.152 | 0.416 | -0.092 | 0.378 | 0.325 | 0.536 | -0.139 | -0.185 | 0.879 | 0.844 | -0.316 | 0.084 | 0.162 | -0.377 | -0.505 | 0.472 | 0.444 | -0.223 | 0.975 | 0.145 |
|  | 2.5% | 0.378 | -1.232 | 0.280 | -0.205 | 0.257 | 0.174 | 0.441 | -0.380 | -0.279 | 0.819 | 0.496 | -0.468 | -0.055 | -0.307 | -0.727 | -0.689 | 0.363 | 0.355 | -0.473 | 0.742 | -0.063 |
|  | 97.5% | 0.491 | -1.054 | 0.502 | -0.009 | 0.458 | 0.456 | 0.660 | 0.020 | 0.124 | 1.046 | 1.262 | -0.101 | 0.279 | 0.624 | -0.079 | -0.407 | 0.722 | 0.667 | 0.141 | 1.068 | 0.425 |
| β4j | Bayesian Mean | -0.163 | 0.367 | -0.257 | 0.041 | 0.351 | -0.583 | -0.255 | -0.147 | -0.083 | -0.279 | 0.369 | -0.143 | 0.274 | 0.103 | 0.135 | 0.216 | 0.149 | -0.230 | 0.458 | -0.463 | -0.183 |
| MLE | -0.143 | 0.372 | -0.242 | 0.056 | 0.388 | -0.557 | -0.264 | -0.162 | -0.109 | -0.295 | 0.410 | -0.130 | 0.315 | 0.100 | 0.137 | 0.220 | 0.078 | -0.218 | 0.328 | -0.436 | -0.155 |
|  | 2.5% | -0.203 | 0.316 | -0.310 | -0.008 | 0.227 | -0.693 | -0.308 | -0.220 | -0.228 | -0.333 | 0.232 | -0.218 | 0.201 | -0.302 | -0.144 | 0.150 | 0.016 | -0.331 | 0.298 | -0.553 | -0.288 |
|  | 97.5% | -0.124 | 0.419 | -0.200 | 0.090 | 0.470 | -0.466 | -0.203 | -0.081 | 0.050 | -0.229 | 0.503 | -0.070 | 0.347 | 0.504 | 0.375 | 0.285 | 0.280 | -0.137 | 0.623 | -0.374 | -0.082 |
| β5j | Bayesian Mean | -0.340 | 0.015 | -0.139 | 0.124 | -1.916 | -0.501 | -0.169 | -0.340 | 0.439 | -0.137 | 0.158 | -0.171 | 0.986 | -0.471 | -0.156 | -0.469 | -2.117 | 0.439 | -0.081 | 0.479 | 0.133 |
| MLE | -0.344 | -0.061 | -0.108 | 0.065 | -2.026 | -0.468 | -0.189 | -0.388 | 0.349 | -0.118 | 0.097 | -0.117 | 0.967 | -0.192 | -0.056 | -0.365 | -1.365 | 0.481 | -0.024 | 0.452 | 0.125 |
|  | 2.5% | -0.415 | -0.161 | -0.275 | -0.096 | -2.185 | -0.704 | -0.291 | -0.590 | 0.040 | -0.279 | -0.167 | -0.421 | 0.684 | -1.040 | -0.635 | -0.881 | -2.557 | 0.233 | -0.336 | 0.249 | -0.253 |
|  | 97.5% | -0.270 | 0.173 | 0.004 | 0.338 | -1.648 | -0.302 | -0.040 | -0.089 | 0.804 | -0.002 | 0.501 | 0.095 | 1.292 | 0.111 | 0.257 | -0.136 | -1.755 | 0.658 | 0.193 | 0.721 | 0.534 |
| β6j | Bayesian Mean | 0.087 | -0.295 | 0.060 | -0.112 | -0.695 | -0.265 | 0.266 | 0.222 | -0.466 | 0.062 | -0.303 | -0.191 | -0.671 | -0.197 | 0.033 | -0.067 | -0.895 | -0.320 | -0.208 | -0.009 | -0.090 |
| MLE | 0.101 | -0.354 | 0.046 | -0.047 | -0.640 | -0.230 | 0.260 | 0.142 | -0.396 | 0.073 | -0.247 | -0.142 | -0.691 | -0.171 | 0.067 | -0.047 | -0.808 | -0.308 | -0.224 | 0.037 | 0.064 |
|  | 2.5% | 0.045 | -0.392 | -0.048 | -0.233 | -0.799 | -0.356 | 0.200 | 0.100 | -0.686 | -0.037 | -0.560 | -0.356 | -0.874 | -0.462 | -0.192 | -0.237 | -1.101 | -0.482 | -0.387 | -0.156 | -0.288 |
|  | 97.5% | 0.129 | -0.192 | 0.162 | 0.006 | -0.599 | -0.179 | 0.328 | 0.343 | -0.216 | 0.160 | -0.075 | -0.031 | -0.456 | 0.066 | 0.291 | 0.136 | -0.755 | -0.171 | -0.035 | 0.121 | 0.115 |
| β7j | Bayesian Mean | 0.625 | 2.915 | -0.134 | 0.706 | -2.849 | 1.424 | 0.426 | -0.146 | 2.117 | -0.722 | 0.243 | 0.048 | 1.563 | 2.108 | -1.433 | -0.018 | -2.116 | -0.239 | 2.431 | -0.133 | 1.531 |
| MLE | 0.635 | 2.886 | -0.019 | 0.679 | -2.878 | 1.407 | 0.417 | -0.194 | 2.148 | -0.757 | -0.181 | -0.446 | 1.520 | 2.642 | -0.654 | 0.129 | -0.116 | -0.219 | 2.615 | -0.034 | 1.496 |
|  | 2.5% | 0.554 | 2.762 | -0.346 | 0.290 | -2.983 | 1.179 | 0.202 | -0.856 | 1.610 | -0.940 | -0.450 | -0.439 | 1.061 | 1.261 | -2.269 | -1.028 | -2.862 | -0.474 | 1.880 | -0.398 | 0.910 |
|  | 97.5% | 0.700 | 2.994 | 0.073 | 1.136 | -2.661 | 1.695 | 0.673 | 0.426 | 2.589 | -0.498 | 0.952 | 0.535 | 1.964 | 2.831 | -0.673 | 0.949 | -1.153 | -0.001 | 2.895 | 0.138 | 2.224 |
| β8j | Bayesian Mean | 0.240 | -1.237 | -0.066 | -0.391 | -1.064 | 1.126 | -0.114 | -0.142 | -1.039 | -0.343 | -1.636 | -0.167 | -1.411 | 0.668 | 0.565 | -0.054 | -0.537 | 0.656 | -2.411 | 0.111 | -1.094 |
| MLE | 0.249 | -1.246 | -0.061 | -0.503 | -1.065 | 1.154 | -0.154 | -0.178 | -1.128 | -0.379 | -1.805 | -0.016 | -1.450 | 0.769 | 0.548 | 0.039 | -0.348 | 0.639 | -2.332 | 0.100 | -1.041 |
|  | 2.5% | 0.195 | -1.328 | -0.209 | -0.648 | -1.133 | 0.965 | -0.282 | -0.522 | -1.399 | -0.524 | -2.217 | -0.476 | -1.720 | 0.414 | 0.207 | -0.545 | -0.813 | 0.522 | -2.896 | -0.071 | -1.527 |
|  | 97.5% | 0.284 | -1.132 | 0.082 | -0.150 | -0.983 | 1.272 | 0.061 | 0.313 | -0.672 | -0.166 | -1.080 | 0.143 | -1.072 | 0.938 | 0.945 | 0.440 | -0.145 | 0.794 | -1.779 | 0.287 | -0.701 |
| β9j | Bayesian Mean | -0.264 | -0.276 | -0.144 | 0.013 | 0.086 | 0.057 | -0.072 | -0.108 | 0.304 | -0.699 | -0.261 | -0.037 | 0.040 | 0.311 | -0.277 | -0.242 | 0.389 | -0.008 | 0.297 | 0.195 | -0.027 |
| MLE | -0.282 | -0.217 | -0.141 | -0.088 | 0.076 | 0.024 | -0.053 | -0.054 | 0.111 | -0.701 | -0.332 | -0.017 | 0.013 | 0.314 | -0.109 | -0.258 | 0.415 | -0.021 | 0.227 | 0.343 | -0.161 |
|  | 2.5% | -0.307 | -0.362 | -0.261 | -0.079 | 0.028 | -0.064 | -0.187 | -0.261 | 0.130 | -0.817 | -0.546 | -0.176 | -0.169 | 0.121 | -0.472 | -0.402 | 0.291 | -0.136 | 0.078 | 0.016 | -0.223 |
|  | 97.5% | -0.219 | -0.188 | -0.019 | 0.101 | 0.138 | 0.167 | 0.044 | 0.040 | 0.472 | -0.587 | 0.033 | 0.116 | 0.217 | 0.493 | -0.087 | -0.086 | 0.492 | 0.126 | 0.529 | 0.375 | 0.167 |
| β10j | Bayesian Mean | 0.100 | -0.417 | 0.033 | 0.022 | 0.003 | 0.058 | 0.064 | -0.085 | 0.262 | 0.190 | 0.719 | 0.035 | 0.179 | 0.013 | -0.107 | -0.058 | 0.107 | 0.210 | 0.961 | 0.148 | -0.008 |
| MLE | 0.104 | -0.407 | 0.046 | -0.019 | 0.004 | 0.048 | 0.060 | -0.082 | 0.277 | 0.171 | 0.655 | 0.003 | 0.190 | 0.016 | -0.087 | -0.075 | 0.060 | 0.161 | 1.006 | 0.137 | -0.005 |
|  | 2.5% | 0.053 | -0.490 | -0.016 | -0.041 | -0.028 | -0.002 | 0.020 | -0.156 | 0.153 | 0.143 | 0.507 | -0.026 | 0.074 | -0.138 | -0.243 | -0.154 | 0.054 | 0.087 | 0.779 | 0.075 | -0.108 |
|  | 97.5% | 0.143 | -0.344 | 0.080 | 0.086 | 0.034 | 0.117 | 0.107 | -0.012 | 0.377 | 0.243 | 0.927 | 0.095 | 0.280 | 0.164 | 0.028 | 0.035 | 0.156 | 0.328 | 1.151 | 0.218 | 0.094 |
| β11j | Bayesian Mean | 0.389 | 0.336 | 0.239 | -0.209 | 0.295 | -1.650 | 0.491 | 0.556 | 0.159 | 0.313 | 1.105 | -0.527 | 0.866 | -0.190 | 0.036 | 0.206 | -0.246 | -0.615 | 0.131 | -1.220 | 0.419 |
| MLE | 0.291 | 0.381 | 0.165 | -0.262 | 0.157 | -1.701 | 0.547 | 0.535 | 0.153 | 0.332 | 1.142 | -0.318 | 1.067 | -0.014 | -0.079 | 0.345 | -0.109 | 0.000 | -0.082 | -0.557 | 0.009 |
|  | 2.5% | 0.159 | 0.188 | -0.088 | -0.538 | 0.111 | -2.056 | 0.270 | 0.216 | -0.727 | 0.071 | 0.681 | -0.983 | 0.583 | -0.416 | -0.633 | -0.142 | -0.450 | -1.691 | -0.579 | -1.627 | 0.072 |
|  | 97.5% | 0.588 | 0.539 | 0.488 | 0.227 | 0.458 | -1.335 | 0.710 | 0.918 | 0.818 | 0.703 | 1.418 | -0.239 | 1.105 | 0.060 | 0.489 | 0.610 | -0.038 | 0.694 | 0.675 | -0.680 | 0.730 |
| β12j | Bayesian Mean | 0.129 | 0.092 | 0.108 | 0.040 | 0.104 | -0.294 | 0.128 | 0.231 | 0.117 | 0.048 | 0.388 | -0.088 | 0.111 | -0.012 | 0.003 | 0.080 | 0.002 | -0.133 | -0.006 | -0.175 | 0.124 |
| MLE | 0.110 | 0.098 | 0.113 | 0.035 | 0.075 | -0.134 | 0.147 | 0.250 | 0.068 | 0.109 | 0.535 | -0.007 | 0.157 | -0.028 | 0.000 | 0.085 | 0.014 | -0.035 | -0.024 | -0.109 | 0.053 |
|  | 2.5% | 0.088 | 0.060 | 0.017 | -0.016 | 0.071 | -0.378 | 0.062 | 0.110 | -0.044 | -0.042 | 0.201 | -0.228 | 0.007 | -0.051 | -0.110 | 0.014 | -0.036 | -0.366 | -0.295 | -0.271 | 0.049 |
|  | 97.5% | 0.165 | 0.133 | 0.178 | 0.119 | 0.135 | -0.216 | 0.193 | 0.337 | 0.237 | 0.177 | 0.529 | 0.007 | 0.202 | 0.029 | 0.081 | 0.156 | 0.041 | 0.153 | 0.232 | -0.058 | 0.191 |
| β13j | Bayesian Mean | 0.006 | 0.073 | 0.093 | 0.013 | 0.014 | 0.010 | 0.101 | 0.113 | 0.024 | 0.124 | 0.111 | 0.142 | 0.100 | -0.025 | -0.012 | 0.047 | 0.012 | -0.018 | 0.131 | -0.002 | 0.017 |
| MLE | 0.004 | 0.071 | 0.035 | 0.017 | 0.015 | 0.022 | 0.102 | 0.112 | -0.015 | 0.106 | 0.029 | 0.130 | 0.031 | -0.020 | -0.006 | 0.032 | 0.007 | -0.008 | 0.120 | 0.001 | -0.004 |
|  | 2.5% | -0.003 | 0.062 | 0.068 | 0.001 | 0.006 | -0.006 | 0.082 | 0.089 | 0.003 | 0.106 | 0.075 | 0.120 | 0.071 | -0.037 | -0.025 | 0.017 | -0.001 | -0.030 | 0.092 | -0.014 | -0.010 |
|  | 97.5% | 0.018 | 0.085 | 0.115 | 0.025 | 0.022 | 0.030 | 0.123 | 0.137 | 0.055 | 0.145 | 0.143 | 0.168 | 0.125 | -0.007 | 0.002 | 0.067 | 0.026 | -0.004 | 0.176 | 0.012 | 0.050 |
| β14j | Bayesian Mean | -2.0E-04 | -7.0E-04 | -1.6E-03 | -1.2E-04 | -2.4E-04 | -3.2E-04 | -2.1E-03 | -1.5E-03 | -6.0E-04 | -2.2E-03 | -1.9E-03 | -2.1E-03 | -1.8E-03 | 2.1E-04 | 9.8E-05 | -4.8E-04 | -2.6E-04 | -3.8E-05 | -2.1E-03 | -1.1E-04 | -5.2E-04 |
| MLE | 7.0E-06 | -7.4E-04 | -1.0E-03 | 1.0E-06 | -2.1E-04 | -1.7E-04 | -2.1E-03 | -1.5E-03 | -5.5E-04 | -1.9E-03 | -1.1E-03 | -6.6E-04 | -1.7E-03 | 2.2E-04 | 1.0E-04 | -4.2E-04 | -1.1E-04 | 5.1E-05 | -1.8E-03 | 0.0E+00 | -3.7E-04 |
|  | 2.5% | -3.6E-04 | -8.8E-04 | -1.9E-03 | -2.9E-04 | -3.8E-04 | -6.3E-04 | -2.5E-03 | -1.9E-03 | -1.1E-03 | -2.6E-03 | -2.4E-03 | -2.6E-03 | -2.3E-03 | -1.8E-05 | -5.1E-05 | -8.5E-04 | -4.8E-04 | -2.3E-04 | -2.8E-03 | -2.9E-04 | -1.0E-03 |
|  | 97.5% | -9.1E-05 | -5.4E-04 | -1.2E-03 | 5.1E-05 | -1.0E-04 | -8.7E-05 | -1.7E-03 | -1.1E-03 | -2.9E-04 | -1.9E-03 | -1.4E-03 | -1.7E-03 | -1.3E-03 | 3.7E-04 | 2.3E-04 | -4.5E-06 | -5.1E-05 | 7.5E-05 | -1.5E-03 | 1.3E-05 | -8.8E-05 |

Table of maximum likelihood estimators (MLEs), Bayesian means and 2.5% and 97.5% confidence levels calculated from the posterior distributions for each of the 15 parameters of Eqn (9) for each of the 21 common species parameterised by the adaptive MCMC algorithm. The burn-in for the algorithm was 750,000 iterations and the sampling was 250,000 iterations.
